# Supplementary figures and images for: An Evidence-Based Procedure for Self-Management of Medication in Hospital: Development and Validation of the SelfMED Procedure
Source: MDPI journal article supplement (doi:10.3390/pharmacy6030077), 2018-07-26

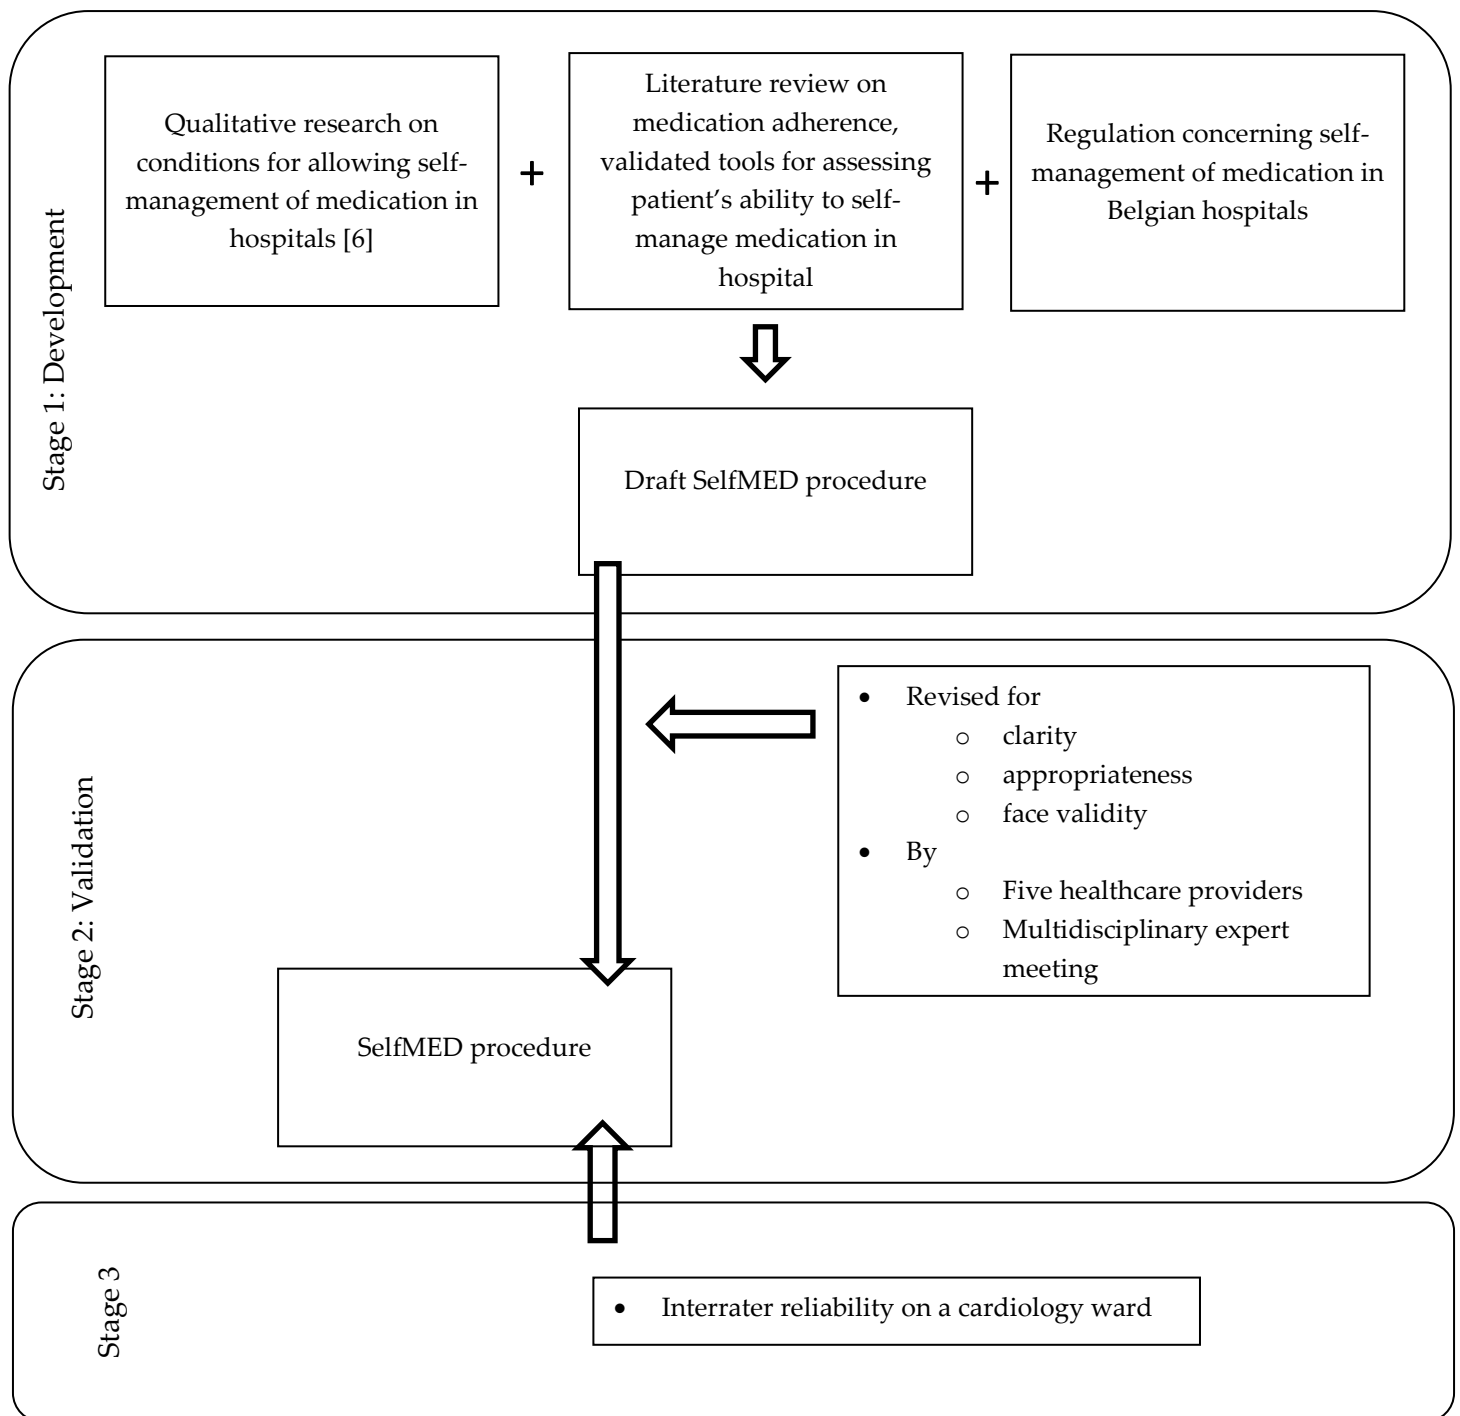

Figure S1: Development and validation of the SelfMED procedure

Supplement: s1 [file s1]

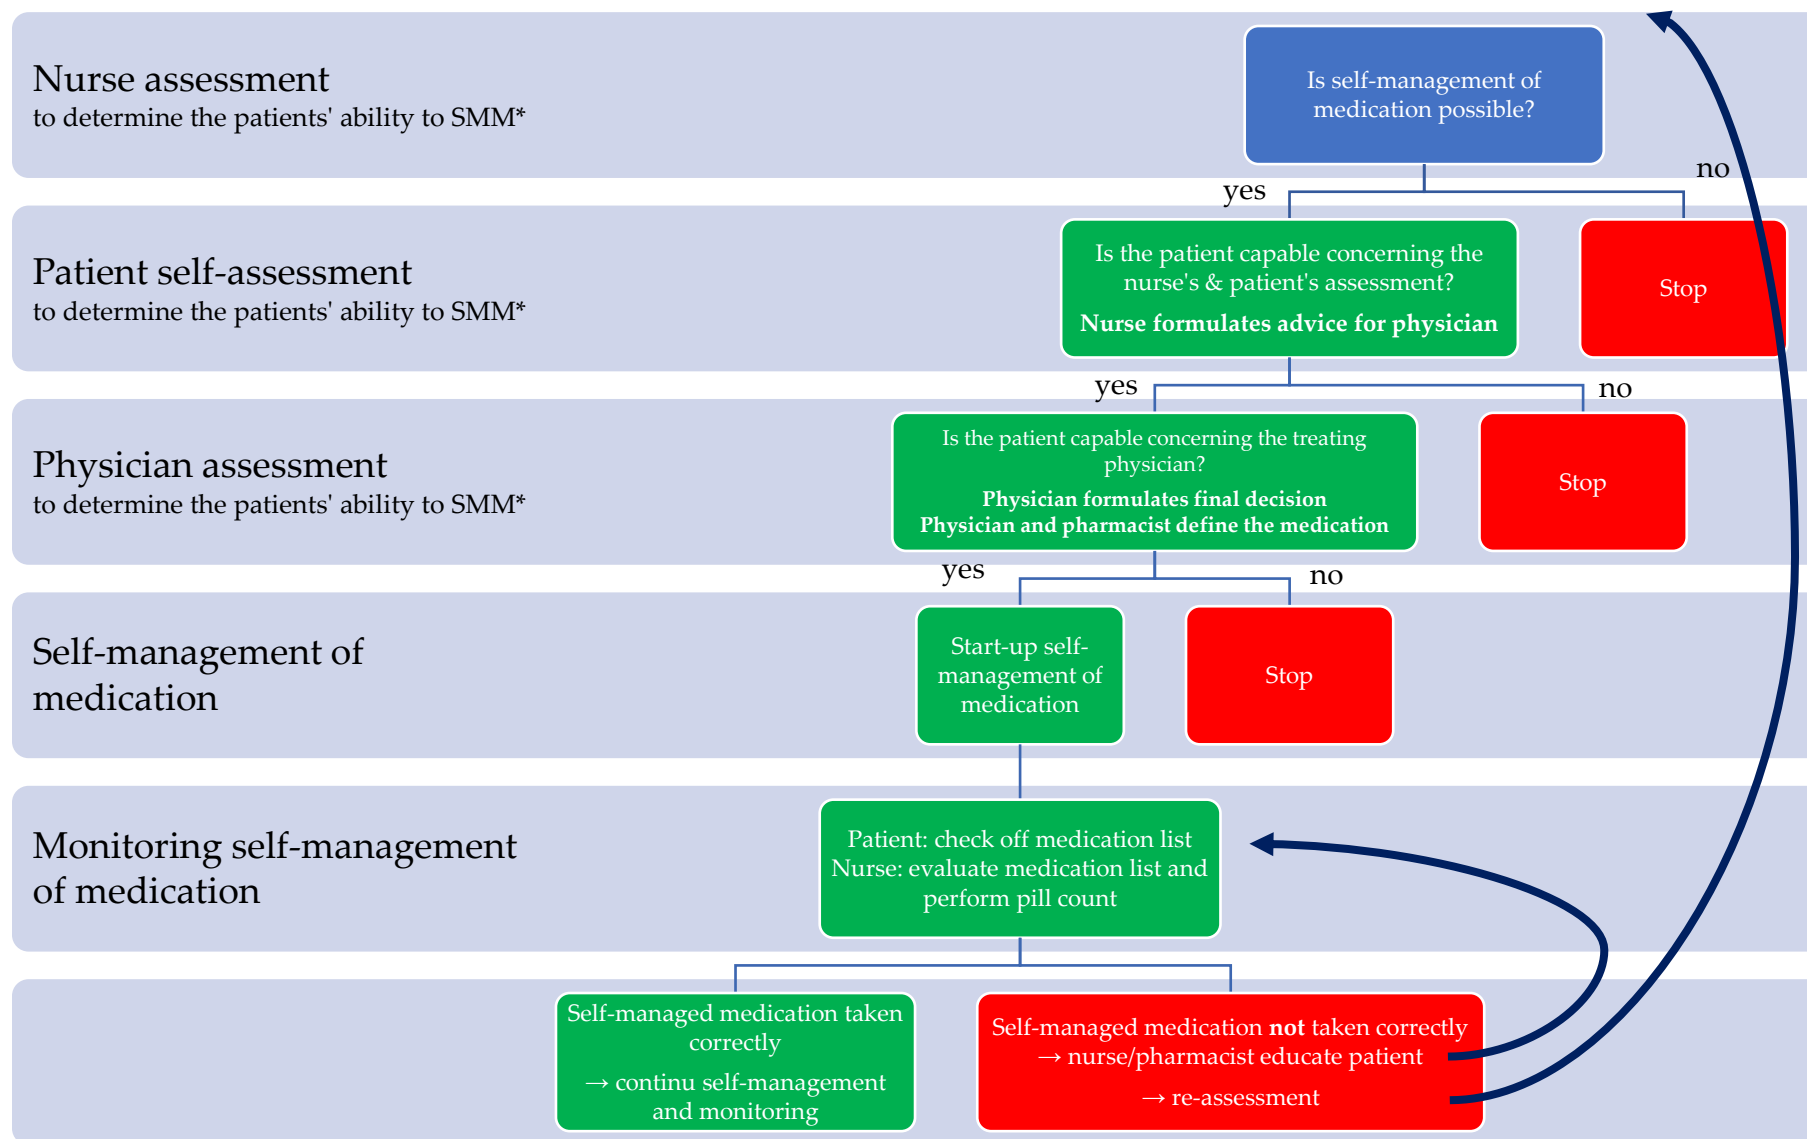

\* SMM: Self-management of medication

Figure S2: The SelfMED flowchart.

Supplement: s1 [file s1]
